# Supplementary material
Source: MDPI journal article supplement (https://www.mdpi.com/2079-6412/11/7/809)
Supplement: s1 [file s1]

# Supplementary Materials: Zn-Doped CaP-Based Coatings on Ti-6Al-4V and Ti-6Al-7Nb Alloys Prepared by Magnetron Sputtering: Controllable Biodegradation, Bacteriostatic, and Osteogenic Activities

Konstantin A. Prosolov <sup>1</sup>, Dmitrii V. Mitrichenko <sup>2</sup>, Aleksandr B. Prosolov <sup>2</sup>, Olga O. Nikolaeva <sup>2</sup>, Vladimir V. Lastovka <sup>1</sup>, Olga A. Belyavskaya <sup>1</sup>, Valentina A. Chebodaeva <sup>1</sup>, Ivan A. Glukhov <sup>1</sup>, Larisa S. Litvinova <sup>3,\*</sup>, Valeria V. Shupletsova <sup>3</sup>, Olga G. Khaziakhmatova <sup>3</sup>, Vladimir V. Malashchenko <sup>3</sup>, Kristina A. Yurova <sup>3</sup>, Egor O. Shunkin <sup>3</sup>, Maxim A. Fedorov <sup>4</sup>, Andrei R. Komkov <sup>5</sup>, Vladimir V. Pavlenko <sup>6</sup>, Ilya I. Anisenya <sup>7</sup>, Yurii P. Sharkeev <sup>1,8</sup>, Alina Vladescu <sup>9,10</sup> and Igor A. Khlusov <sup>2,10,11,\*</sup>

**Citation:** Prosolov, K.A.; Mitrichenko, D.V.; Prosolov, A.B.; Nikolaeva, O.O.; Lastovka, V.V.; Belyavskaya, O.A.; Chebodaeva, V.A.; Glukhov, I.A.; Litvinova, L.S.; Shupletsova, V.V.; et al. Zn-Doped CaP-Based Coatings on Ti-6Al-4V and Ti-6Al-7Nb Alloys Prepared by Magnetron Sputtering: Controllable Biodegradation, Bacteriostatic, and Osteogenic Activities. *Coatings* **2021**, *11*, 809. <https://doi.org/10.3390/coatings11070809>

Academic Editors: Seunghan Oh and Elvira De Giglio

Received: 12 April 2021

Accepted: 29 June 2021

Published: 3 July 2021

**Publisher's Note:** MDPI stays neutral with regard to jurisdictional claims in published maps and institutional affiliations.

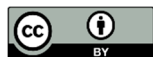

**Copyright:** © 2021 by the authors. Submitted for possible open access publication under the terms and conditions of the Creative Commons Attribution (CC BY) license (<http://creativecommons.org/licenses/by/4.0/>).

- <sup>1</sup> Laboratory of Physics of Nanostructured Biocomposites, Institute of Strength Physics and Materials Science SB RAS (ISPMS SB RAS), 634055 Tomsk, Russia; konstprosolov@gmail.com (K.A.P.); vladimirlastovka1948@gmail.com (V.V.L.); obel@ispms.ru (O.A.B.); vtina5@mail.ru (V.A.C.); gia@ispms.ru (I.A.G.); sharkeev@ispms.ru (Y.P.S.)
  - <sup>2</sup> LLC "SPC "SINTEL", 634061 Tomsk, Russia; director@sintelbio.com (D.V.M.); info.promit@mail.ru (A.B.P.); production@sintelbio.com (O.O.N.)
  - <sup>3</sup> Center for Immunology and Cell Biotechnology, Immanuel Kant Baltic Federal University, 236029 Kaliningrad, Russia; vshupletsova@mail.ru (V.V.S.); hazik36@mail.ru (O.G.K.); vlmalashchenko@kantiana.ru (V.V.M.); kristina\_kofanova@mail.ru (K.A.Y.); egor.shunkin@gmail.com (E.O.S.)
  - <sup>4</sup> Siberian Federal Scientific and Clinical Center of the Federal Medical-Biological Agency, 636070 Seversk, Russia; Fma555@mail.ru
  - <sup>5</sup> Division of Traumatology and Orthopedics, Regional Clinical Emergency Hospital, 650000 Kemerovo, Russia; komkov.simfo@yandex.ru
  - <sup>6</sup> Medical Officer for Science, Regional Clinical Emergency Hospital, 650000 Kemerovo, Russia; Pavlenkovv@list.ru
  - <sup>7</sup> Department of General Oncology, Cancer Research Institute, Tomsk National Research Medical Center, Russian Academy of Sciences, 634009 Tomsk, Russia; aii@mail.tsu.ru
  - <sup>8</sup> Research School of High-Energy Physics, National Research Tomsk Polytechnic University, 634050 Tomsk, Russia
  - <sup>9</sup> National Institute of Research and Development for Optoelectronics INOE2000, Magurele, 077125 Bucharest, Romania; alinava@inoe.ro
  - <sup>10</sup> Research School of Chemistry and Applied Biomedical Sciences, National Research Tomsk Polytechnic University, 634050 Tomsk, Russia
  - <sup>11</sup> Department of Morphology and General Pathology, Siberian State Medical University, 634050 Tomsk, Russia
- \* Correspondence: larisalitvinova@yandex.ru (L.S.L.); khlusov63@mail.ru (I.A.K.); Tel.: +7-4012-595-595 (ext. 6631) (L.S.L.); +8-3822-901-101 (ext. 1823) (I.A.K.)

Additional analysis of statistical power and sample size for results after coating deposition presented in Table 2:

| Type of coating/substrate | Statistical power calculated | Real sample size | Sample size required |
|---------------------------|------------------------------|------------------|----------------------|
| Zn-CaP/Ti-6Al-7Nb         | 0.99                         | 6                | 5                    |
| Zn-CaP/Ti-6Al-4V          | 0.99                         | 6                | 3                    |
| CaP/Ti-6Al-7Nb            | 0.99                         | 6                | 6                    |
| CaP/Ti-6Al-4V             | 0.99                         | 6                | 3                    |

Additional analysis of statistical power and sample size for results presented in Table

4

| Type of Coating/Substrate              | Statistical Power (SP) Calculated | Real Sample Sizes in Coated Substrates | Sample Size Required |
|----------------------------------------|-----------------------------------|----------------------------------------|----------------------|
| Zn-CaP/Ti-6Al-4V vs. CaP/Ti-6Al-4V     | 0.91                              | 8                                      | 7                    |
| Zn-CaP/Ti-6Al-7Nb vs. Zn-CaP/Ti-6Al-4V | 0.99                              | 8                                      | 6                    |
| CaP/Ti-6Al-7Nb vs. CaP/Ti-6Al-4V       | 0.83                              | 8                                      | 8                    |

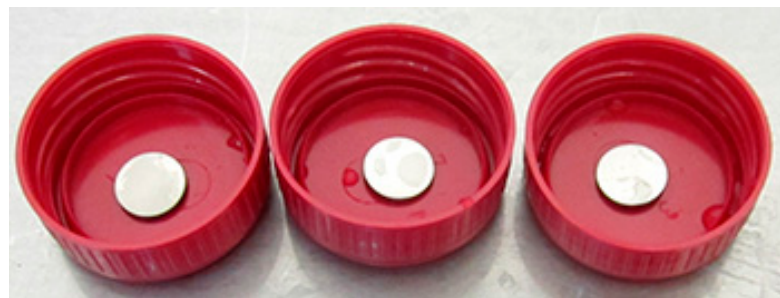

(a)

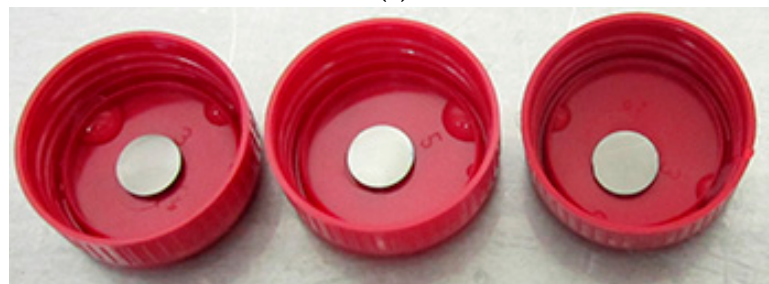

(b)

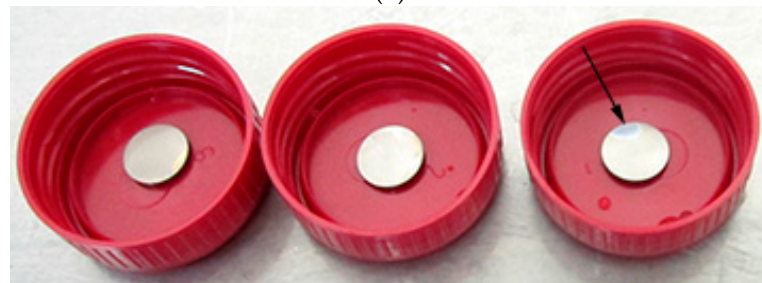

(c)

**Figure S1.** Surface condition of test samples after 5 weeks of in vitro immersion in 0.9% NaCl solution: (a) Ti-6Al-4V substrate; (b) CaP coating; (c) Zn-CaP coating. A site of visible coating biodegradation is shown by black arrow. .

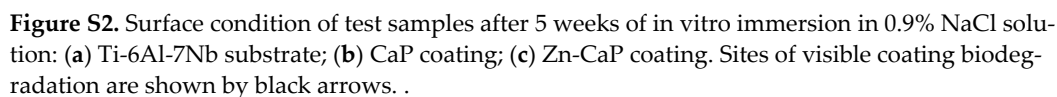

**Figure S2.** Surface condition of test samples after 5 weeks of in vitro immersion in 0.9% NaCl solution: (a) Ti-6Al-7Nb substrate; (b) CaP coating; (c) Zn-CaP coating. Sites of visible coating biodegradation are shown by black arrows. .

**Table S1.** Viability of Jurkat T cells after different culture periods in the presence of one-sided CaP coatings on Ti-based alloys; Me (Q1–Q3).

| Groups,<br>n=3                    |                          | Cell Number, %          |                      |                      |                                                                            |                                                          |                                        |
|-----------------------------------|--------------------------|-------------------------|----------------------|----------------------|----------------------------------------------------------------------------|----------------------------------------------------------|----------------------------------------|
|                                   |                          | Live cells              | Apoptotic-like cells | Dead cells           | Live cells                                                                 | Apoptotic-like cells                                     | Dead cells                             |
|                                   |                          | 24 h                    |                      |                      | 48 h                                                                       |                                                          |                                        |
| Control<br>(without test samples) |                          | 97.45<br>(97.17-97.90)  | 0.47<br>(0.37-0.84)  | 1.78<br>(1.11-2.17)  | 93.26#<br>(92.64-93.54)<br>P <sub>T</sub>                                  | 3.15#<br>(3.04-3.30)<br>P <sub>T</sub>                   | 3.59#<br>(3.22-4.03)<br>P <sub>T</sub> |
| Ti-6Al-4V alloy                   |                          |                         |                      |                      |                                                                            |                                                          |                                        |
| 1                                 | Uncoated metal substrate | 95.30<br>(94.39-95.62)  | 0.82<br>(0.67-0.89)  | 3.91*<br>(3.31-4.73) | 93.83<br>(93.29-93.87)<br>P <sub>T</sub>                                   | 2.86#<br>(2.54-2.89)<br>P <sub>T</sub>                   | 3.22<br>(3.09-3.96)                    |
| 2                                 | CaP coating              | 94.38*<br>(94.30-96.00) | 1.14<br>(0.63-1.35)  | 4.28*<br>(3.30-4.48) | 93.40<br>(93.14-93.57)<br>P <sub>T</sub>                                   | 3.05#<br>(2.75-3.20)<br>P <sub>T</sub>                   | 3.42<br>(3.36-3.84)                    |
| 3                                 | Zn-CaP coating           | 96.85<br>(95.62-99.88)  | 0.67<br>(0.49-1.09)  | 2.17<br>(1.51-3.74)  | 91.79#<br>(91.04-92.69)<br>P <sub>1</sub> ,P <sub>2</sub> ; P <sub>T</sub> | 3.56*#<br>(3.34-3.77)<br>P <sub>1</sub> ; P <sub>T</sub> | 4.75#<br>(3.76-5.37)<br>P <sub>1</sub> |
| Ti-6Al-7Nb alloy                  |                          |                         |                      |                      |                                                                            |                                                          |                                        |

|   |                          |                               |                            |                            |                                                   |                                                |                                               |
|---|--------------------------|-------------------------------|----------------------------|----------------------------|---------------------------------------------------|------------------------------------------------|-----------------------------------------------|
| 4 | Uncoated metal substrate | 91.99*<br>(90.79-94.31)<br>P1 | 2.03*<br>(1.73-2.56)<br>P1 | 5.81*<br>(3.96-6.35)       | 90.14*<br>(89.33-91.08)<br>P1; P <sub>T</sub>     | 4.55*#<br>(4.21-4.78)<br>P1; P <sub>T</sub>    | 5.32*<br>(4.72-5.89)<br>P1                    |
| 5 | CaP coating              | 95.72<br>(94.43-97.33)<br>P4  | 0.93<br>(0.64-1.44)        | 3.27*<br>(2.56-3.89)<br>P4 | 91.58*#<br>(90.66-92.52)<br>P2; P <sub>T</sub>    | 3.75*#<br>(3.33-3.89)<br>P4; P <sub>T</sub>    | 4.68*#<br>(4.16-5.46)<br>P2; P <sub>T</sub>   |
| 6 | Zn-CaP coating           | 93.29*<br>(91.10-94.47)<br>P5 | 2.38*<br>(1.79-2.87)<br>P5 | 4.80*<br>(3.73-6.18)       | 89.16*#<br>(87.66-89.30)<br>P3,P5; P <sub>T</sub> | 4.62*#<br>(4.47-4.74)<br>P3,P5; P <sub>T</sub> | 6.28*<br>(6.18-7.40)<br>P3,P5; P <sub>T</sub> |

n - the number of test samples (wells) tested; Statistical differences (P<0.05) are shown according to the Mann-Whitney test: \*) - with control; #) - with corresponding values of 24-h culture; P1-P5 - with corresponding test groups. P<sub>T</sub> means statistical differences (P<0.05) with corresponding values of 24-h culture according to the Wilcoxon criterion for dependent samples. Duplicate probes for each test sample were measured. Each control well was done in quadruplicate.

**Table S2.** Results of Zn<sup>2+</sup> concentration (mg/dm<sup>3</sup>; ppm) in extracts determined by stripping voltammetry during 5-week in vitro immersion of one-sided CaP coatings on Ti-based alloys in 0.9% NaCl solution; Me(Q1–Q3).

| Groups, n=3 |                                | Weeks of Immersion                          |                                              |                                              |                                              |                                              |                                              |                                              |                                              |
|-------------|--------------------------------|---------------------------------------------|----------------------------------------------|----------------------------------------------|----------------------------------------------|----------------------------------------------|----------------------------------------------|----------------------------------------------|----------------------------------------------|
|             |                                | 1                                           |                                              | 2                                            |                                              | 3                                            |                                              | 5                                            |                                              |
|             |                                | Ti-6Al-4V                                   | Ti-6Al-7Nb                                   | Ti-6Al-4V                                    | Ti-6Al-7Nb                                   | Ti-6Al-4V                                    | Ti-6Al-7Nb                                   | Ti-6Al-4V                                    | Ti-6Al-7Nb                                   |
| 1           | Control (without test samples) | 0.023 (0.018-0.026)<br>n <sub>i</sub> =24   |                                              |                                              |                                              |                                              |                                              |                                              |                                              |
| 2           | CaP coating                    | 0.020<br>(0.019-0.022)<br>n <sub>i</sub> =9 | 0.019<br>(0.014-0.020)<br>n <sub>i</sub> =9  | 0.021<br>(0.019-0.030)<br>n <sub>i</sub> =9  | 0.025<br>(0.024-0.031)<br>n <sub>i</sub> =9  | 0.024<br>(0.023-0.031)<br>n <sub>i</sub> =9  | 0.021 (0.015-0.036)<br>n <sub>i</sub> =9     | 0.032<br>(0.024-0.033)<br>n <sub>i</sub> =6  | 0.027<br>(0.023-0.036)<br>n <sub>i</sub> =6  |
| 3           | Zn-CaP coating                 | 0.019<br>(0.015-0.020)<br>n <sub>i</sub> =9 | 0.035*<br>(0.029-0.036)<br>n <sub>i</sub> =9 | 0.061*<br>(0.058-0.063)<br>n <sub>i</sub> =9 | 0.037*<br>(0.031-0.043)<br>n <sub>i</sub> =9 | 0.041*<br>(0.032-0.046)<br>n <sub>i</sub> =9 | 0.044*<br>(0.043-0.054)<br>n <sub>i</sub> =9 | 0.069*<br>(0.068-0.070)<br>n <sub>i</sub> =9 | 0.050*<br>(0.046-0.053)<br>n <sub>i</sub> =9 |
|             |                                | P1=0.0007<br>P2=0.0003<br>P3<0.05           | P1=0.000001<br>P2=0.000000<br>1              | P1=0.008<br>P2=0.03<br>P3<0.05               | P1=0.000004<br>P2=0.00004<br>P2=0.000001     | P1=0.000008<br>P2=0.0000001<br>1             | P1=0.000000<br>1<br>P2=0.000000<br>1         | P1=0.0000001<br>P2=0.00003                   |                                              |

n—the number of test samples (wells) tested; n<sub>i</sub> - the number of probes measured; \*) - Statistical differences (P1, P2) with corresponding groups and between Zn-CaP coating on diverse substrates (P3) are shown according to the Mann-Whitney test. Small variation of surface areas of CaP coatings (Table 1) were not taken into account.

**Table S3.** Results of analyte concentration (mM) and pH value in extracts determined by ion-selective electrode during 5-week in vitro immersion of one-sided CaP coatings on Ti-based alloys in 0.9% NaCl solution; Me(Q1–Q3).

| Groups, n=3 |                                | 1 week              |                      |                     |                     |                     |                                  |                     |                     |
|-------------|--------------------------------|---------------------|----------------------|---------------------|---------------------|---------------------|----------------------------------|---------------------|---------------------|
|             |                                | pH                  | [Ca] total           |                     | [Ca <sup>2+</sup> ] |                     | [PO <sub>4</sub> <sup>3-</sup> ] |                     |                     |
|             |                                | Ti-6Al-4V           | Ti-6Al-7Nb           | Ti-6Al-4V           | Ti-6Al-7Nb          | Ti-6Al-4V           | Ti-6Al-7Nb                       | Ti-6Al-4V           | Ti-6Al-7Nb          |
|             | Control (without test samples) | 7.29 (7.27-7.30)    |                      | 0.01 (0-0.01)       |                     | 0.09 (0.08-0.11)    |                                  | 0 (0-0.04)          |                     |
|             | Uncoated metal substrate       | 7.28<br>(7.28-7.28) | 7.25*<br>(7.24-7.25) | 0.01<br>(0.01-0.01) | 0.01<br>(0.01-0.02) | 0.07<br>(0.07-0.09) | 0.09<br>(0.09-0.09)              | 0.06<br>(0.04-0.07) | 0.04<br>(0.03-0.05) |

|                                |                       |                       |                       |                       |                       |                       |                                  |                       |
|--------------------------------|-----------------------|-----------------------|-----------------------|-----------------------|-----------------------|-----------------------|----------------------------------|-----------------------|
| CaP coating                    | 7.46*#<br>(7.32-7.46) | 7.46*#<br>(7.43-7.46) | 0.82*#<br>(0.30-1.12) | 0.96*#<br>(0.90-1.11) | 1.04*#<br>(0.49-1.36) | 1.21*#<br>(1.17-1.41) | 0.40*#<br>(0.22-0.47)            | 0.35*#<br>(0.32-0.46) |
| Zn-CaP coating                 | 7.42*#<br>(7.41-7.46) | 7.51*#<br>(7.47-7.52) | 0.91*#<br>(0.80-0.93) | 1.11*#<br>(1.06-1.13) | 1.16*#<br>(0.88-1.22) | 1.44*#<br>(1.33-1.45) | 0.27*#<br>(0.22-0.28)            | 0.31*#<br>(0.30-0.40) |
| <b>2 weeks</b>                 |                       |                       |                       |                       |                       |                       |                                  |                       |
| Groups, n=3                    | pH                    |                       | [Ca] total            |                       | [Ca <sup>2+</sup> ]   |                       | [PO <sub>4</sub> <sup>3-</sup> ] |                       |
|                                | Ti-6Al-4V             | Ti-6Al-7Nb            | Ti-6Al-4V             | Ti-6Al-7Nb            | Ti-6Al-4V             | Ti-6Al-7Nb            | Ti-6Al-4V                        | Ti-6Al-7Nb            |
| Control (without test samples) | 7.29 (7.29-7.36)      |                       | 0.01 (0.01-0.02)      |                       | 0.09 (0.08-0.11)      |                       | 0.04 (0-0.06)                    |                       |
| Uncoated metal substrate       | 7.28<br>(7.28-7.30)   | 7.29<br>(7.26-7.31)   | 0.01<br>(0-0.01)      | 0.02<br>(0.02-0.03)   | 0.09<br>(0.08-0.10)   | 0.11<br>(0.09-0.14)   | 0.07<br>(0.06-0.08)              | 0.06<br>(0.06-0.07)   |
| CaP coating                    | 7.29<br>(7.29-7.41)   | 7.40*#<br>(7.40-7.42) | 0.29*#<br>(0.29-0.77) | 0.60*#<br>(0.58-0.72) | 0.46*#<br>(0.46-0.98) | 0.82*#<br>(0.81-0.95) | 0.35*#<br>(0.32-0.36)            | 0.47*#<br>(0.46-0.48) |
| Zn-CaP coating                 | 7.30<br>(7.28-7.31)   | 7.38*#<br>(7.38-7.41) | 0.23*#<br>(0.18-0.27) | 0.65*#<br>(0.62-0.74) | 0.39*#<br>(0.34-0.46) | 0.87*#<br>(0.86-0.96) | 0.29*#<br>(0.23-0.35)            | 0.49*#<br>(0.48-0.54) |
| <b>3 weeks</b>                 |                       |                       |                       |                       |                       |                       |                                  |                       |
| Groups, n=3                    | pH                    |                       | [Ca] total            |                       | [Ca <sup>2+</sup> ]   |                       | [PO <sub>4</sub> <sup>3-</sup> ] |                       |
|                                | Ti-6Al-4V             | Ti-6Al-7Nb            | Ti-6Al-4V             | Ti-6Al-7Nb            | Ti-6Al-4V             | Ti-6Al-7Nb            | Ti-6Al-4V                        | Ti-6Al-7Nb            |
| Control (without test samples) | 7.29 (7.29-7.30)      |                       | 0.01 (0-0.01)         |                       | 0.09 (0.08-0.10)      |                       | 0.03 (0-0.08)                    |                       |
| Uncoated metal substrate       | 7.29<br>(7.29-7.31)   | 7.27<br>(7.27-7.29)   | 0.01<br>(0.01-0.02)   | 0.01<br>(0.01-0.02)   | 0.10<br>(0.09-0.11)   | 0.10<br>(0.09-0.12)   | 0.04<br>(0.03-0.05)              | 0.04<br>(0-0.05)      |
| CaP coating                    | 7.27*#<br>(7.26-7.28) | 7.30<br>(7.28-7.32)   | 0.03*#<br>(0.03-0.10) | 0.20*#<br>(0.19-0.22) | 0.13*#<br>(0.12-0.24) | 0.36*#<br>(0.36-0.41) | 0.10<br>(0.08-0.16)              | 0.25*#<br>(0.23-0.30) |
| Zn-CaP coating                 | 7.27#<br>(7.26-7.29)  | 7.27<br>(7.27-7.29)   | 0.07*#<br>(0.05-0.10) | 0.16*#<br>(0.15-0.16) | 0.21*#<br>(0.17-0.24) | 0.31*#<br>(0.31-0.32) | 0.15*#<br>(0.12-0.20)            | 0.22*#<br>(0.20-0.23) |
| <b>4 weeks</b>                 |                       |                       |                       |                       |                       |                       |                                  |                       |
| Groups, n=3                    | pH                    |                       | [Ca] total            |                       | [Ca <sup>2+</sup> ]   |                       | [PO <sub>4</sub> <sup>3-</sup> ] |                       |
|                                | Ti-6Al-4V             | Ti-6Al-7Nb            | Ti-6Al-4V             | Ti-6Al-7Nb            | Ti-6Al-4V             | Ti-6Al-7Nb            | Ti-6Al-4V                        | Ti-6Al-7Nb            |
| Control (without test samples) | 7.28 (7.27-7.29)      |                       | 0.01 (0.01-0.02)      |                       | 0.11 (0.11-0.11)      |                       | 0.06 (0-0.06)                    |                       |
| Uncoated metal substrate       | 7.28<br>(7.24-7.29)   | 7.28<br>(7.26-7.29)   | 0.01<br>(0.01-0.01)   | 0.02<br>(0.01-0.02)   | 0.09<br>(0.08-0.09)   | 0.10<br>(0.08-0.10)   | 0.05<br>(0.04-0.06)              | 0.06<br>(0.04-0.08)   |

|                                |                      |                       |                      |                       |                      |                       |                                  |                       |
|--------------------------------|----------------------|-----------------------|----------------------|-----------------------|----------------------|-----------------------|----------------------------------|-----------------------|
| CaP coating                    | 7.27<br>(7.21-7.28)  | 7.21*#<br>(7.18-7.25) | 0.01<br>(0.01-0.03)  | 0.06*#<br>(0.05-0.06) | 0.11<br>(0.09-0.15)  | 0.13*#<br>(0.13-0.16) | 0.04<br>(0.03-0.08)              | 0.13<br>(0.06-0.14)   |
| Zn-CaP coating                 | 7.25<br>(7.24-7.29)  | 7.22*#<br>(7.21-7.23) | 0.03#<br>(0.02-0.03) | 0.05*#<br>(0.04-0.05) | 0.12#<br>(0.10-0.13) | 0.14*#<br>(0.12-0.15) | 0.06<br>(0.05-0.20)              | 0.10*#<br>(0.09-0.12) |
| <b>5 weeks</b>                 |                      |                       |                      |                       |                      |                       |                                  |                       |
| Groups, n=3                    | pH                   |                       | [Ca] total           |                       | [Ca <sup>2+</sup> ]  |                       | [PO <sub>4</sub> <sup>3-</sup> ] |                       |
|                                | Ti-6Al-4V            | Ti-6Al-7Nb            | Ti-6Al-4V            | Ti-6Al-7Nb            | Ti-6Al-4V            | Ti-6Al-7Nb            | Ti-6Al-4V                        | Ti-6Al-7Nb            |
| Control (without test samples) | 7.30 (7.30-7.30)     |                       | 0.02 (0.01-0.03)     |                       | 0.11 (0.11-0.13)     |                       | 0 (0-0.02)                       |                       |
| Uncoated metal substrate       | 7.30<br>(7.29-7.31)  | 7.27*<br>(7.25-7.28)  | 0.01<br>(0.01-0.01)  | 0.01<br>(0.01-0.01)   | 0.09<br>(0.08-0.11)  | 0.07*<br>(0.06-0.08)  | 0.01<br>(0-0.02)                 | 0<br>(0-0.01)         |
| CaP coating                    | 7.29*<br>(7.27-7.29) | 7.25*<br>(7.23-7.26)  | 0.03<br>(0.01-0.04)  | 0.03#<br>(0.03-0.04)  | 0.12<br>(0.09-0.16)  | 0.10<br>(0.10-0.12)   | 0<br>(0-0.03)                    | 0.03<br>(0-0.03)      |
| Zn-CaP coating                 | 7.30<br>(7.25-7.30)  | 7.26*<br>(7.25-7.26)  | 0.01<br>(0.01-0.02)  | 0.02#<br>(0.02-0.03)  | 0.10*<br>(0.07-0.10) | 0.10*#<br>(0.09-0.10) | 0.04<br>(0-0.05)                 | 0.02<br>(0-0.06)      |

n—the number of test samples (wells) tested; \*) - Statistical differences ( $P < 0.05$ ) with control group; #) Statistical differences with corresponding uncoated metal substrate are shown according to the Mann-Whitney test. Duplicate probes for each test sample were measured. Small variation of surface areas of CaP coatings (Table 1) were not taken into account.
